# Supplementary material for: A Literature Review of the Use of Weeds and Agricultural and Food Industry By-Products to Feed Farmed Crickets (Insecta; Orthoptera; Gryllidae)
Source: Frontiers journal article supplement (doi:10.3389/fsufs.2021.810421), 2022-01-31
Supplement: Data_Sheet_2.xlsx [file Data_Sheet_2.xlsx]

## Sheet: Performance
Feed	Composition	Source	Feed Category	Feed Plan	Species	Crude Protein (%DM)	Carbohydrate (%DM)	Crude Fat (%DM)	Mean Final Weight (g)	Final Survival (%)	Reference
1st two weeks daily carrots, following 3x a week + chicken feed	Chicken feed (Kuikenopfokmeel 1; Kasper Faunafood, Woerden, the Netherlands) suppelemted with carrots provided daily the first 2 weeks, then 3x a week following	NA	Commercial, agricultural product	Supplemented	Acheta domesticus	NA	NA	NA	0.338	0.848	Veenenbos and Oonincx, 2017
1st week daily carrots, following 3x a week + chicken feed	Chicken feed (Kuikenopfokmeel 1; Kasper Faunafood, Woerden, the Netherlands) suppelemted with carrots provided daily for the first week, then 3x a week following	NA	Commercial, agricultural product	Supplemented	Acheta domesticus	NA	NA	NA	0.338	0.84	Veenenbos and Oonincx, 2017
3x week carrots + chicken feed	Chicken feed (Kuikenopfokmeel 1; Kasper Faunafood, Woerden, the Netherlands) suppelemted with carrots provided 3x a week	NA	Commercial, agricultural product	Supplemented	Acheta domesticus	NA	NA	NA	0.33	0.83	Veenenbos and Oonincx, 2017
Alternanthera sessilis	NA	Collected mainly on roadsides and fallow land around CelAgrid once a week during the wet season	Weed	Pure alternative	Teleogryllus testaceus	0.15	NA	0.056	0.2	0.05	Miech et al., 2016			\
Amaranthus spinosus	NA	Collected mainly on roadsides and fallow land around CelAgrid once a week during the wet season	Weed	Pure alternative	Teleogryllus testaceus	0.244	NA	0.06	0.15	0.25	Miech et al., 2016
Banana peels	Musa acuminate	Purchased daily from the market	Food waste	Pure alternative	Acheta domesticus	0.075	NA	NA	NA	NA	Oloo et al., 2019
Barley feed (high protein)	Patton's 16 with all of the soybean meal replaced with barley feed (Hordeum vulgare) (15% proportion of total feed). Barley feed is a by-product of ethanol production	Altia Oyj	Agricultural product, agricultural byproduct, animal byproduct	Supplemented	Acheta domesticus	0.3	0.51	0.052	0.35	0.85	Sorjonen et al., 2019
Barley feed (high protein)	Patton's 16 with all of the soybean meal replaced with barley feed (Hordeum vulgare) (15% proportion of total feed) Barley feed is a by-product of ethanol production	Altia Oyj	Agricultural product, agricultural byproduct, animal byproduct	Supplemented	Gryllus bimaculatus	0.3	0.51	0.052	0.93	0.3	Sorjonen et al., 2019
Barley feed (low protein)	Patton's 16 with all of the soybean meal replaced with barley feed (31% proportion of total feed) barley feed is a by-product of ethanol production (Hordeum vulgare)	Altia Oyj	Agricultural product, agricultural byproduct, animal byproduct	Supplemented	Acheta domesticus	0.15	0.66	0.065	0.22	0.86	Sorjonen et al., 2019
Barley feed (low protein)	Patton's 16 with all of the soybean meal replaced with barley feed (31% proportion of total feed) barley feed is a by-product of ethanol production (Hordeum vulgare)	Altia Oyj	Agricultural product, agricultural byproduct, animal byproduct	Supplemented	Gryllus bimaculatus	0.15	0.66	0.065	0.75	0.28	Sorjonen et al., 2019
Barley feed (medium protein)	Patton's 16 with all of the soybean meal replaced with barley feed (Hordeum vulgare) (44% proportion of total feed) barley feed is a by-product of ethanol production	Altia Oyj	Agricultural product, agricultural byproduct, animal byproduct	Supplemented	Acheta domesticus	0.225	0.582	0.074	0.33	0.9	Sorjonen et al., 2019
Barley feed (medium protein)	Patton's 16 with all of the soybean meal replaced with barley feed (Hordeum vulgare) (44% proportion of total feed) barley feed is a by-product of ethanol production	Altia Oyj	Agricultural product, agricultural byproduct, animal byproduct	Supplemented	Gryllus bimaculatus	0.225	0.582	0.074	0.93	0.43	Sorjonen et al., 2019
Barley feed 15% protein	Patton’s (1967) diet no. 16, in which the major protein source, soybeans, was partly or totally replaced with by barley feed, a by-product of ethanol produciton	A-rehu	Agricultural product, agricultural byproduct, animal byproduct	Supplemented	Ruspolia differens	0.15	0.66	0.065	0.38	0.62	Sorjonen et al., 2020
Barley feed 22.5% protein	Patton’s (1967) diet no. 16, in which the major protein source, soybeans, was partly or totally replaced with barley feed, a by-product of ethanol production	A-rehu	Agricultural product, agricultural byproduct, animal byproduct	Supplemented	Ruspolia differens	0.225	0.582	0.074	0.42	0.8	Sorjonen et al., 2020
Barley mash (high protein)	Patton's 16 with all of the soybean meal replaced with barley mash (Hordeum vulgare) (29% proportion of total feed) Barley mash is a by-product of beer production	Honkavuori brewery Oy	Agricultural product, agricultural byproduct, animal byproduct	Supplemented	Acheta domesticus	0.305	0.505	0.057	0.36	0.92	Sorjonen et al., 2019
Barley mash (high protein)	Patton's 16 with all of the soybean meal replaced with barley mash (Hordeum vulgare) (29% proportion of total feed) Barley mash is a by-product of beer production	Honkavuori brewery Oy	Agricultural product, agricultural byproduct, animal byproduct	Supplemented	Gryllus bimaculatus	0.305	0.505	0.057	0.98	0.5	Sorjonen et al., 2019
Barley mash (low protein)	Patton's 16 with all of the soybean meal replaced with barley mash (Hordeum vulgare) (20% proportion of total feed) Barley mash is a by-product of beer production	Honkavuori brewery Oy	Agricultural product, agricultural byproduct, animal byproduct	Supplemented	Acheta domesticus	0.15	0.66	0.054	0.25	0.83	Sorjonen et al., 2019
Barley mash (low protein)	Patton's 16 with all of the soybean meal replaced with barley mash (Hordeum vulgare) (20% proportion of total feed) Barley mash is a by-product of beer production	Honkavuori brewery Oy	Agricultural product, agricultural byproduct, animal byproduct	Supplemented	Gryllus bimaculatus	0.15	0.66	0.054	0.65	0.4	Sorjonen et al., 2019
Barley mash (medium protein)	Patton's 16 with all of the soybean meal replaced with barley mash (Hordeum vulgare) (41% proportion of total feed) Barley mash is a by-product of beer production	Honkavuori brewery Oy	Agricultural product, agricultural byproduct, animal byproduct	Supplemented	Acheta domesticus	0.225	0.58	0.065	0.35	0.95	Sorjonen et al., 2019
Barley mash (medium protein)	Patton's 16 with all of the soybean meal replaced with barley mash (Hordeum vulgare) (41% proportion of total feed) Barley mash is a by-product of beer production	Honkavuori brewery Oy	Agricultural product, agricultural byproduct, animal byproduct	Supplemented	Gryllus bimaculatus	0.225	0.58	0.065	1	0.38	Sorjonen et al., 2019
Barley mash 15% protein	Patton’s (1967) diet no. 16, in which the major protein source, soybeans, was partly or totally replaced with barley mash, a by-product of beer production	Panimo Honkavuori Oy	Agricultural product, agricultural byproduct, animal byproduct	Supplemented	Ruspolia differens	0.15	0.66	0.054	0.42	0.57	Sorjonen et al., 2020
Barley mash 22.5% protein	Patton’s (1967) diet no. 16, in which the major protein source, soybeans, was partly or totally replaced with by barley mash, a by-product of beer production	Panimo Honkavuori Oy	Agricultural product, agricultural byproduct, animal byproduct	Supplemented	Ruspolia differens	0.225	0.58	0.065	0.38	0.7	Sorjonen et al., 2020
Betagrow Chicken Feed	Fish meal, meat, ground bone, soybean meal and/or sun flower seed meal, corn meal and/or millet and/or broken rice and/or cassava, rice bran and/or defatted rice bran, molasses, vegetable oil, calcium carbonate and/or dicalcium phosphate, salt, vitamins, minerals, and amino acids.	Betagro 215, Betagro, Bangkok, Thailand	Commercial	Pure commercial	Acheta domesticus	0.158	0.65	0.052	0.419	0.92	Bawa et al., 2020
Betagrow Chicken Feed + Pure Pride Cricket Feed	See "Betagrow" and"Pure Pride"	NA	Commercial	Supplemented	Acheta domesticus	0.189	0.653	0.034	0.422	0.95	Bawa et al., 2020
Blood meal	NA	The dried blood meal was procured from local agro-vet shops near to the Jaramogi Oginga Odinga University of Science and Technology Insect Farm in Bondo, Kenya.	Animal byproduct	Pure alternative	Acheta domesticus	0.8746	NA	0.00149	NA	NA	Orinda et al., 2017
Blood meal	NA	The dried blood meal was procured from local agro-vet shops near to the Jaramogi Oginga Odinga University of Science and Technology Insect Farm in Bondo, Kenya.	Animal byproduct	Pure alternative	Gryllus bimaculatus	0.8746	NA	0.00149	NA	NA	Orinda et al., 2017	** crude fat contents for Magara et al., 2015
Boerhavia diffusa	NA	Collected mainly on roadsides and fallow land around CelAgrid once a week during the wet season	Weed	Pure alternative	Teleogryllus testaceus	0.238	NA	0.047	0.3	0.1	Miech et al., 2016
Brassica oleracea var. ocephala	Common name: kales	purchased daily from the market	Agricultural product	Pure alternative	Acheta domesticus	0.2687	NA	NA	NA	NA	Oloo et al., 2019
Brassica rapa	Common name: Xiao bai cai	Obtained from Shifa Vegetable Stall, Serangoon Market, Singapore	Agricultural product	Pure alternative	Acheta domesticus	NA	NA	NA	NA	0.444	Choo et al., 2017
Brassica rapa	Common name: Xiao bai cai	Obtained from Shifa Vegetable Stall, Serangoon Market, Singapore	Agricultural product	Pure alternative	Valangra negricornis and Xenocatanops humilis	NA	NA	NA	NA	0.222	Choo et al., 2017
Brassica rapa	Common name: Xiao bai cai	(Budget Vegetables, produced in Malaysia and packed for National Trades Union Congress FairPrice Co-operative Limited, Singapore, Republic of Singapore) was purchased from a local supermarket.	Agricultural product	Pure alternative	Acheta domesticus	NA	NA	NA	0.24	0.1	Quek et al., 2019	*** crude fat contents for Megido et al., 2015
Brassica rapa + dog food	Common name: Xiao bai cai	Brassica rapa (Budget Vegetables, produced in Malaysia and packed for National Trades Union Congress FairPrice Co-operative Limited, Singapore, Republic of Singapore) was purchased from a local supermarket. Dog food pellets (SmartHeart adult dog dry food, chicken and egg flavour) were obtained from Perfect Companion, Singapore, Republic of Singapore to represent a premium diet.	Commercial, agricultural product	Supplemented	Acheta domesticus	NA	NA	NA	0.4	1	Quek et al., 2019
Brassica rapa with okara	Okara is a soybean residue from the manufacture of soy milk and tofu	Brassica rapa (Budget Vegetables, produced in Malaysia and packed for National Trades Union Congress FairPrice Co-operative Limited, Singapore, Republic of Singapore) was purchased from a local supermarket. Okara was obtained from a local soybean snack shop, NandB Snack at Block 148, Singapore, Republic of Singapore.	Agricultural product, agricultural byproduct	Supplemented	Acheta domesticus	NA	NA	NA	0.26	0.22	Quek et al., 2019
Brewer's spent grain	NA	The spent grain was obtained from Kenya Breweries Company.	Agricultural byproduct	Pure alternative	Acheta domesticus	0.2713	NA	0.079	NA	NA	Orinda et al., 2017
Brewer's spent grain	NA	The spent grain was obtained from Kenya Breweries Company.	Agricultural byproduct	Pure alternative	Gryllus bimaculatus	0.2713	NA	0.079	NA	NA	Orinda et al., 2017
Brewer's spent yeast	NA	The spent yeast was obtained from Kenya Breweries Company.	Agricultural byproduct	Pure alternative	Acheta domesticus	0.4971	NA	0.0157	NA	NA	Orinda et al., 2017
Brewer's spent yeast	NA	The spent yeast was obtained from Kenya Breweries Company.	Agricultural byproduct	Pure alternative	Gryllus bimaculatus	0.4971	NA	0.0157	NA	NA	Orinda et al., 2017
Broad bean pea (high protein)	Patton's 16 with all of the soybean meal replaced with broad bean pea (Vicia faba) (30% proportion of total feed)	Karita	Agricultural product, agricultural byproduct, animal byproduct	Supplemented	Acheta domesticus	0.3	0.504	0.038	0.38	0.7	Sorjonen et al., 2019
Broad bean pea (high protein)	Patton's 16 with all of the soybean meal replaced with broad bean pea (Vicia faba) (30% proportion of total feed)	Karita	Agricultural product, agricultural byproduct, animal byproduct	Supplemented	Gryllus bimaculatus	0.3	0.504	0.038	0.75	0.4	Sorjonen et al., 2019
Broad bean pea (low protein)	Patton's 16 with all of the soybean meal replaced with broad bean pea (Vicia faba) (13% proportion of total feed)	Karita	Agricultural product, agricultural byproduct, animal byproduct	Supplemented	Acheta domesticus	0.15	0.66	0.042	0.26	0.75	Sorjonen et al., 2019
Broad bean pea (low protein)	Patton's 16 with all of the soybean meal replaced with broad bean pea (Vicia faba) (13% proportion of total feed)	Karita	Agricultural product, agricultural byproduct, animal byproduct	Supplemented	Gryllus bimaculatus	0.15	0.66	0.042	0.65	0.43	Sorjonen et al., 2019
Broad bean pea (medium protein)	Patton's 16 with all of the soybean meal replaced with broad bean pea (Vicia faba) (30% proportion of total feed)	Karita	Agricultural product, agricultural byproduct, animal byproduct	Supplemented	Acheta domesticus	0.225	0.582	0.039	0.35	0.65	Sorjonen et al., 2019
Broad bean pea (medium protein)	Patton's 16 with all of the soybean meal replaced with broad bean pea (Vicia faba) (30% proportion of total feed)	Karita	Agricultural product, agricultural byproduct, animal byproduct	Supplemented	Gryllus bimaculatus	0.225	0.582	0.039	0.7	0.5	Sorjonen et al., 2019
Broad bean pea 15% protein	Patton’s (1967) diet no. 16, in which the major protein source, soybeans, was partly or totally replaced with by broad bean and pea, a common protein source in Finland	Boreal Plant Breeding, Apetit Oyj	Agricultural product, agricultural byproduct, animal byproduct	Supplemented	Ruspolia differens	0.15	0.66	0.042	0.28	0.35	Sorjonen et al., 2020
Carrots	Daucus carota sub sp. Sativus L. (Apiales: Apiaceae)	sourced from a farmer who practiced organic farming with no chemicals used for insect pest management to ensure that they were free from any pesticide residues	Agricultural product	Pure alternative	Scapsipedus icipe	0.0824	0.6761	2.91%*	0.398	0.55	Magara et al., 2015
Cassava tops	Cassava tops (unspecified genus and species), also commonly called manioc or yuca	Harvested from a farm near Center for Livestock and Agricultural Development (CelAgrid) in Phnom Penh, Cambodia	Agricultural byproduct	Pure alternative	Teleogryllus testaceus	0.286	NA	0.046	1.1	0.35	Miech et al., 2016
Chicken feed	composed of maize, broken rice, extracted oil, rice bran, fishmeal and soybean	Top Feed	Commercial	Pure commercial	Teleogryllus testaceus	0.234	NA	0.09	1	0.2	Miech et al., 2016
Chicken feed	NA	Purchased from local market in Cambodia	Commercial	Pure commercial	Gryllus bimaculatus	NA	NA	NA	1.11	0.825	Ng'ang'a et al., 2020
Chicken feed	NA	Milka kanata¨ysrehu	Commercial	Pure commercial	Gryllus bimaculatus	0.152	0.566	0.044	0.85	0.45	Sorjonen et al., 2019
Chicken feed	NA	Milka kanata¨ysrehu	Commercial	Pure commercial	Acheta domesticus	0.152	0.566	0.044	0.38	0.85	Sorjonen et al., 2019	** crude fat for Morales-Ramon et al., 2020
Chicken feed	NA	Milka kanata¨ysrehu	Commercial	Pure commercial	Ruspolia differens	0.152	0.566	0.044	0.45	0.52	Sorjonen et al., 2020
Chicken feed	Chicken feed (Kuikenopfokmeel 1; Kasper Faunafood, Woerden, the Netherlands)	NA	Commercial	Pure commercial	Acheta domesticus	0.2	NA	0.045	0.336	0.718	Veenenbos and Oonincx, 2017
Chicken feed (1 week) millet beer waste (3 weeks)	Chicken feed and millet beer waste (dried, frozen, and ground)	millet beer waste was sourced from local breweries in Burkina Faso, dried and frozen prior to transport and then ground for use as feed.	Commercial, agricultural byproduct	Supplemented	Gryllus bimaculatus	NA	NA	NA	0.3	0.16	Dobermann et al., 2019
Ugali	Ugali is corn cake prepared by stirring cornflour in boiling water. The cornflour is added into the boiling water while stirring to achieve the softness that is the characteristic of ugali	NA	Agricultural product	Pure alternative	Acheta domesticus	0.95	NA	NA	NA	NA	Oloo et al., 2019
Chicken feed (2 weeks) millet beer waste (2 weeks)	Chicken feed and millet beer waste (dried, frozen, and ground)	millet beer waste was sourced from local breweries in Burkina Faso, dried and frozen prior to transport and then ground for use as feed.	Commercial, agricultural byproduct	Supplemented	Gryllus bimaculatus	NA	NA	NA	0.55	0.18	Dobermann et al., 2019
High protein high fat	60% spent grain 20% beer yeast 20% cookie remains	Spent grains and beer yeast: Anheuser-Busch, Dommelen, The Netherlands	Agricultural byproduct, food waste	Pure alternative	Acheta domesticus	0.219	NA	NA	NA	0.27	Oonincx et al., 2015
Chicken feed (4 weeks)	Predominantly wheat and soya bean meal	Fancy Feed Layers Pellets (Fancy Feed Company, Essex, UK	Commercial	Pure commercial	Gryllus bimaculatus	0.19	NA	NA	0.8	0.55	Dobermann et al., 2019
Chicken feed and Commelina sinensis*	Chicken feed and common wandering jew	NA	Commercial, weed	Supplemented	Gryllus bimaculatus	NA	NA	NA	1.39	0.85	Ng'ang'a et al., 2020
Cleome rutidosperma	Cleome rutidosperma	Collected mainly on roadsides and fallow land around CelAgrid once a week during the wet season	Weed	Pure alternative	Teleogryllus testaceus	0.222	NA	0.032	0.85	0.3	Miech et al., 2016
Cleome viscosa	Cleome viscosa	Collected mainly on roadsides and fallow land around CelAgrid once a week during the wet season	Weed	Pure alternative	Teleogryllus testaceus	0.229	NA	0.025	0.7	0.3	Miech et al., 2016
Commelina benghalensis	Commelina benghalensis	Collected mainly on roadsides and fallow land around CelAgrid once a week during the wet season	Weed	Pure alternative	Teleogryllus testaceus	0.167	NA	0.037	0.7	0.25	Miech et al., 2016
Concentrate + cassava leaves	Concentrate of broiler chicken feed with a protein content of 20%-22% and forage such as cassava (Manihot esculenta) leaves	Undisclosed	Commercial, agricultural byproduct	Supplemented	Gryllus spp.	NA	NA	NA	NA	NA	Fuah et al., 2015
Concentrate + papaya leaves	concentrate of broiler chicken feed with a protein content of 20%-22% and papaya (Carica papaya) leaves	Undisclosed	Commercial, agricultural byproduct	Supplemented	Gryllus spp.	NA	NA	NA	NA	NA	Fuah et al., 2015
Control	NA	Kreca VOF	Commercial	Pure commercial	Acheta domesticus	0.172	NA	NA	NA	0.55	Oonincx et al., 2015
Control	Wheat bran 30.8% Oats bran 29.6% Wheat meal 22.4% Rapeseed meal 15.0% CaCO3 1.79% Trace elements + vitamin premix 0.40%	Rapeseed meal: expro 00SF Trace elements + vitamin premix (Lantmännen Lantbruk, Malmö, Sweden).	Commercial	Pure commercial	Acheta domesticus	0.192	37.6%***	0.025	0.147	0.4	Vaga et al., 2019
Control	Wheat bran 30.8% Oats bran 29.6% Wheat meal 22.4% Rapeseed meal 15.0% CaCO3 1.79% Trace elements + vitamin premix 0.40%	Rapeseed meal: expro 00SF. Trace elements + vitamin premix (Lantmännen Lantbruk, Malmö, Sweden).	Commercial	Pure commercial	Acheta domesticus	0.192	37.6%***	0.025	0.2	0.4	Vaga et al., 2020
Control (native broiler finisher)	Mixed feed for native broiler chicken, unspecified composition	Native Broiler Finisher 1324; GreenFeed, NhtCh nh, Vietnam	Commercial	Pure commercial	Teleogryllus testaceus	0.134	0.615	5.1%**	1.056	0.9112	Megido et al., 2015
Corn	Zea mays L. (Cyperales: Poaceae)	purchased from a certified stockist in a local market in Nairobi, Kenya.	Agricultural product	Pure alternative	Scapsipedus icipe	0.0741	0.5724	2.01%*	0.342	0.4	Magara et al., 2015
Custom cricket feed	Research Diet Services, Wijkbij Duurstede, the Netherlands	NA	Commercial	Pure commercial	Acheta domesticus	0.2	NA	0.033	0.253	0.662	Veenenbos and Oonincx, 2017
Daily carrots + chicken feed	Chicken feed (Kuikenopfokmeel 1; Kasper Faunafood, Woerden, the Netherlands) suppelemted with carrots provided daily	NA	Commercial, agricultural product	Supplemented	Acheta domesticus	NA	NA	NA	0.332	0.882	Veenenbos and Oonincx, 2017
Daily carrots + cricket feed	Carrots with feed provided by Research Diet Services, Wijkbij Duurstede, the Netherlands	NA	Commercial, agricultural byproduct	Supplemented	Acheta domesticus	NA	NA	NA	0.28	0.744	Veenenbos and Oonincx, 2017
Early Cut fresh frozen	Red clover (Phleum pratense) harvested on 27 June at boot stage (before blooming occurred), chopped, and frozen	Red clover (Phleum pratense, cv. Yngve) was harvested from experimental fields at Röbäcksdalen research station, Umeå, Sweden (63°35´N, 20°45´E).	Weed	Pure alternative	Acheta domesticus	0.217	2%***	NA	0.25	0	Vaga et al., 2019
Early cut halylage	Red clover (Phleum pratense) harvested on 27 June at boot stage (before blooming occurred), wilted at 50°C until dry matter concentration was 55%	Red clover (Phleum pratense, cv. Yngve) was harvested from experimental fields at Röbäcksdalen research station, Umeå, Sweden (63°35´N, 20°45´E).	Weed	Pure alternative	Acheta domesticus	0.218	2%***	NA	0.03	0.05	Vaga et al., 2019
Early cut hay	Red clover (Phleum pratense) harvested on 27 June at boot stage (before blooming occurred), dried for three days in a forced air cabinet at 50 °C.	Red clover (Phleum pratense, cv. Yngve) was harvested from experimental fields at Röbäcksdalen research station, Umeå, Sweden (63°35´N, 20°45´E).	Weed	Pure alternative	Acheta domesticus	0.199	1.9%***	NA	0.032	0.08	Vaga et al., 2019
Early cut silage	Red clover (Phleum pratense) harvested on 27 June at boot stage (before blooming occurred), wilted at 50°C until dry matter concentration was 40%	Red clover (Phleum pratense, cv. Yngve) was harvested from experimental fields at Röbäcksdalen research station, Umeå, Sweden (63°35´N, 20°45´E).	Weed	Pure alternative	Acheta domesticus	0.214	1.9%***	NA	0.025	0.08	Vaga et al., 2019
Early-cut red clover	Trifolium pratense	NA	Weed	Pure alternative	Acheta domesticus	0.199	1.9%***	NA	NA	NA	Vaga et al., 2020
Fish offal	of the silver cyprinid (Rastrineobola argentea Pellegrin (Cypriniformes: Cyprinidae	purchased from the Muthurwa market in Nairobi, Kenya	Animal byproduct	Pure alternative	Scapsipedus icipe	0.5599	0.0362	4.55%*	0.69	0.8	Magara et al., 2015
Low protein low fat	30% potato steam peelings 20% beet molasses 50% bread	Beet molasses: Royal Cosun, Breda, The Netherlands Potato steam peelings: Hedimix BV, Boxmeer, The Netherlands Bread remains: Bakkersland BV, Hedel, The Netherlands	Agricultural byproduct, food waste	Pure alternative	Acheta domesticus	0.144	NA	NA	NA	0.11	Oonincx et al., 2015
Low protein high fat	50% cookie remains 50% bread	bread remains: Bakkersland BV, Hedel, The Netherlands cookie remains: Banketbakkerij van Strien, Oud-Beijerland, The Netherlands	Food waste	Pure alternative	Acheta domesticus	0.129	NA	NA	NA	0.07	Oonincx et al., 2015
Grower’s mash	NA	Procured from local agro-vet shops near to the Jaramogi Oginga Odinga University of Science and Technology Insect Farm in Bondo, Kenya	Commercial	Pure commercial	Acheta domesticus	0.1589	NA	0.0759	NA	NA	Orinda et al., 2017
Grower’s mash	NA	Procured from local agro-vet shops near to the Jaramogi Oginga Odinga University of Science and Technology Insect Farm in Bondo, Kenya	Commercial	Pure commercial	Gryllus bimaculatus	0.1589	NA	0.0759	NA	NA	Orinda et al., 2017
Growers mash	NA	Ten kilograms of growers mash purchased from “Unga feeds” Company was ground using an electric mill to break down into flour and avoid wastage. (source: https://unga-group.com/product/grower-mash/)	Commercial	Pure commercial	Acheta domesticus	0.1589	NA	NA	NA	NA	Oloo et al., 2019
Gypsophila paniculata	Common gysophila	Flowering common gypsophila was acquired from a local flower retailer and dried separately in paper bags at room temperature for six days, and then stored in climate stable storage room	Weed	Pure alternative	Acheta domesticus	0.116	NA	NA	NA	0.21	Vaga et al., 2020
Turnip rape (high protein)	Patton's 16 with al of the soybean meal replaced with turnip rape (Brassica rapa) (23% total proportion of feed). Turnip rape is a by-product of rapeseed oil production	Kankaisten ljykasvit Oy	Food waste, agricultural product, agricultural byproduct, animal byproduct	Supplemented	Acheta domesticus	0.305	0.484	0.063	0.45	0.8	Sorjonen et al., 2019
High protein low fat	50% beer yeast 30% potato steam peelings 20% beet molasses	Beer yeast: Anheuser-Busch, Dommelen, The Netherlands Beet molasses: Royal Cosun, Breda, The Netherlands Potato steam peelings: Hedimix BV, Boxmeer, The Netherlands	Agricultural byproduct	Pure alternative	Acheta domesticus	0.229	NA	NA	NA	0.06	Oonincx et al., 2015
Ipomoea aquatica	Common name: kang kong	Obtained from Shifa Vegetable Stall, Serangoon Market, Singapore	Agricultural product	Pure alternative	Acheta domesticus	NA	NA	NA	NA	0.444	Choo et al., 2017
Ipomoea aquatica	Common name: kang kong	Obtained from Shifa Vegetable Stall, Serangoon Market, Singapore	Agricultural product	Pure alternative	Valangra negricornis and Xenocatanops humilis	NA	NA	NA	NA	0.6	Choo et al., 2017
Ipomoea batatas	Sweet potato vines	freshly harvested from the garden	Weed	Pure alternative	Acheta domesticus	0.052	NA	NA	NA	NA	Oloo et al., 2019
Ipomoea Cairica	Common name: Cairo morning glory	Collected from a wasteland site at Lorong Lada Hitam, Singapore	Weed	Pure alternative	Valangra negricornis and Xenocatanops humilis	NA	NA	NA	NA	0.6	Choo et al., 2017
Ipomoea Cairica	Common name: Cairo morning glory	Collected from a wasteland site at Lorong Lada Hitam, Singapore	Weed	Pure alternative	Acheta domesticus	NA	NA	NA	NA	0.444	Choo et al., 2017
Ishaemum muticum	Common name: centipede grass	Collected from a wasteland site at Lorong Lada Hitam, Singapore	Weed	Pure alternative	Acheta domesticus	NA	NA	NA	NA	0.111	Choo et al., 2017
Ishaemum muticum	Common name: centipede grass	Collected from a wasteland site at Lorong Lada Hitam, Singapore	Weed	Pure alternative	Valangra negricornis and Xenocatanops humilis	NA	NA	NA	NA	0	Choo et al., 2017
Late cut fresh frozen	Red clover (Phleum pratense) harvested on 31 July 2017 at late flowering stage (end stage of blooming), chopped, and frozen	Red clover (Phleum pratense, cv. Yngve) was harvested from experimental fields at Röbäcksdalen research station, Umeå, Sweden (63°35´N, 20°45´E).	Weed	Pure alternative	Acheta domesticus	0.128	2.1%***	NA	0.04	0.08	Vaga et al., 2019
Late cut hay	Red clover (Phleum pratense) harvested on 31 July 2017 at late flowering stage (end stage of blooming), dried for three days in a forced air cabinet at 50°C	Red clover (Phleum pratense, cv. Yngve) was harvested from experimental fields at Röbäcksdalen research station, Umeå, Sweden (63°35´N, 20°45´E).	Weed	Pure alternative	Acheta domesticus	0.13	2.2%***	NA	0.03	0.05	Vaga et al., 2019
Late cut haylage	Red clover (Phleum pratense) harvested on 31 July 2017 at late flowering stage (end stage of blooming), wilted at 50°C until dry matter concentration was 55%	Red clover (Phleum pratense, cv. Yngve) was harvested from experimental fields at Röbäcksdalen research station, Umeå, Sweden (63°35´N, 20°45´E).	Weed	Pure alternative	Acheta domesticus	0.143	2%***	NA	0.25	0.05	Vaga et al., 2019
Late-cut red clover	Trifolium pratense	NA	Weed	Pure alternative	Acheta domesticus	0.13	2.2%***	NA	NA	NA	Vaga et al., 2020
Turnip rape (high protein)	Patton's 16 with al of the soybean meal replaced with turnip rape (Brassica rapa) (23% total proportion of feed). Turnip rape is a by-product of rapeseed oil production	Kankaisten ljykasvit Oy	Food waste, agricultural product, agricultural byproduct, animal byproduct	Supplemented	Gryllus bimaculatus	0.305	0.484	0.063	0.9	0.63	Sorjonen et al., 2019
Turnip rape (medium protein)	Patton's 16 with al of the soybean meal replaced with turnip rape (Brassica rapa) (5% total proportion of feed). Turnip rape is a by-product of rapeseed oil production	Kankaisten ljykasvit Oy	Food waste, agricultural product, agricultural byproduct, animal byproduct	Supplemented	Gryllus bimaculatus	0.225	0.568	0.059	0.87	0.55	Sorjonen et al., 2019
Mealworm diet	Suomalainen, 1999	Suomalainen (1999)	Commercial	Pure commercial	Ruspolia differens	0.174	0.604	0.046	0.5	0.7	Sorjonen et al., 2020
Mealworm diet + vitamins	Suomalainen, 1999 with Vanderzant vitamin and Wesson mineral mixtures (Cohen, 2004)	Suomalainen (1999)	commercial	Pure commercial	Ruspolia differens	0.174	0.583	0.043	0.5	0.85	Sorjonen et al., 2020
Millet beer waste (4 weeks)	Millet	Local breweries in Burkina Faso	Agricultural byproduct	Pure alternative	Gryllus bimaculatus	0.237	NA	NA	0.5	0.17	Dobermann et al., 2019
Mixed Diet 1	29% buckwheat seed 9% dry cabbage 8% wheat bran 16% brewers yeast 4% alfalfa pellets (ground) 34% corn (dry distilers grain)	Dry cabbage purchased fresh from local supermarket and dried in a vacuum oven at 50˚C and 180 mbar. Wheat bran: Bob’s Red Mill (Milwaukie, OR, USA) Brewer's yeast: NOW (NOW Foods, Bloomingdale, IL, USA) Alfalfa pellets: Coyote Creek Organic Feed Mill (Elgin, TX, USA) Corn: Ergon Biofuels (Vicksburg, MS, USA) and Big River Resources Galva LLC (Galva, IL, USA).	Agricultural product, agricultural byproduct	Supplemented	Acheta domesticus	0.3	0.64	6%*	0.32	0.69	Morales-Ramos et al., 2020
Mixed Diet 2	25% buckwheat seed 5% wheat bran 5% rice bran 10% brewers yeast 12% alfalfa pellets (ground) 38% corn (dry distillers grain) 5% canola meal (defatted)	Buckwheat seed: Bob’s Red Mill (Milwaukie, OR, USA). Rice bran: Riceland Foods (Jonesboro, AR, USA). Canola meal: ADM Processing Co. (Chicago, IL, USA).	Agricultural product, agricultural byproduct	Supplemented	Acheta domesticus	0.297	0.628	7.5%*	0.3	0.625	Morales-Ramos et al., 2020
Mixed Diet 3	19% buckwheat seed 10% dry cabbage 17% rice bran 17% brewers yeast 3% alfalfa pellets (ground) 28% corn (dry distillers grain) 6% canola meal (defatted)	Dry cabbage purchased fresh from local supermarket and dried in a vacuum oven at 50˚C and 180 mbar. Wheat bran: Bob’s Red Mill (Milwaukie, OR, USA) Brewer's yeast: NOW (NOW Foods, Bloomingdale, IL, USA) Alfalfa pellets: Coyote Creek Organic Feed Mill (Elgin, TX, USA) Corn: Ergon Biofuels (Vicksburg, MS, USA) and Big River Resources Galva LLC (Galva, IL, USA). Canola meal: ADM Processing Co. (Chic…	Agricultural product, agricultural byproduct	Supplemented	Acheta domesticus	0.308	0.601	9.1%*	0.32	0.65	Morales-Ramos et al., 2020
Mixed Diet 4	8% dry cabbage 20% rice bran 8% brewers yeast 4% alfalfa pellets (ground) 30% corn (dry distillers grain) 10% canola meal (defatted) 20% rice bran (defatted)	Dry cabbage purchased fresh from local supermarket and dried in a vacuum oven at 50˚C and 180 mbar. Rice bran: Riceland Foods (Jonesboro, AR, USA). Brewer's yeast: NOW (NOW Foods, Bloomingdale, IL, USA) Alfalfa pellets: Coyote Creek Organic Feed Mill (Elgin, TX, USA) Corn: Ergon Biofuels (Vicksburg, MS, USA) and Big River Resources Galva LLC (Galva, IL, USA). Canola meal: ADM Processing Co. (Chic…	Agricultural product, agricultural byproduct	Supplemented	Acheta domesticus	0.3	0.595	10.5%*	0.32	0.62	Morales-Ramos et al., 2020
Mungbean sprout residue	Vigna radiata unspecified composition	Received from local Cambodian mung bean producer	Agricultural byproduct	Pure alternative	Teleogryllus testaceus	0.194	NA	0.022	0.7	0.3	Miech et al., 2016
Turnip rape (low protein)	Patton's 16 with al of the soybean meal replaced with turnip rape (Brassica rapa) (7% total proportion of feed). Turnip rape is a by-product of rapeseed oil production	Kankaisten ljykasvit Oy	Food waste, agricultural product, agricultural byproduct, animal byproduct	Supplemented	Gryllus bimaculatus	0.15	0.66	0.04	0.65	0.5	Sorjonen et al., 2019
Organic chicken feed	NA	Luonnon Punaheltta	Commercial	Pure commercial	Gryllus bimaculatus	0.179	0.523	0.055	0.85	0.6	Sorjonen et al., 2019
Organic chicken feed	NA	Luonnon Punaheltta	Commercial	Pure commercial	Acheta domesticus	0.179	0.523	0.055	0.41	0.72	Sorjonen et al., 2019
Patton's Diet 1	5% brewer's yeast, dry 20% corn meal 20% meat scrap 7% milk, dried skim 8% soybean meal 40% wheat middlings	NA	Agricultural product, agricultural byproduct, animal byproduct	Supplemented	Acheta domesticus	0.231	0.374	0.053	0.31	0.5	Patton, 1967
Patton's Diet 10	10% brewer's yeast, dry 21% corn meal 20% meat scrap 21% soybean meal 28% wheat middlings	NA	Agricultural product, agricultural byproduct, animal byproduct	Supplemented	Acheta domesticus	0.213	0.243	0.034	0.27	0.65	Patton, 1967
Patton's Diet 11	50% soybean meal 50% wheat middlings	NA	Agricultural product, agricultural byproduct, animal byproduct	Supplemented	Acheta domesticus	0.238	0.362	0.049	0.205	0.72	Patton, 1967
Patton's Diet 12	50% alfalfa meal 50% soybean meal	NA	Agricultural product, agricultural byproduct, animal byproduct	Supplemented	Acheta domesticus	0.27	0.251	0.04	0.23	0.51	Patton, 1967
Patton's Diet 13	10% soy flour (low fat) 35% yellow cornmeal 7.5% dry milk (whole) 7.5% dry milk (skim) 5% dry beef liver (defatted) 30% wheat bran 5% brewers yeast	soy flour (low fat): Bob’s Red Mill (Milwaukie, OR, USA). yellow cornmeal: Bob’s Red Mill (Milwaukie, OR, USA). dry milk (whole): Purchased in the local supermarket from brand names Nido Fortified (Nestle USA Inc., Glendale, CA, USA). dry milk (skim): Purchased in the local supermarket from brand names Nido Fortified (Nestle USA Inc., Glendale, CA, USA). dry beef liver (defatted): unspecified sou…	Agricultural product, agricultural byproduct, animal byproduct	Supplemented	Acheta domesticus	0.268	0.67	6.2%*	0.34	0.825	Morales-Ramos et al., 2020
Patton's Diet 13	5% brewer's yeast, dry 35% corn meal 5% liver powder 15% milk, dried skim 10% soybean meal 30% wheat middlings	NA	Agricultural product, agricultural byproduct, animal byproduct	Supplemented	Acheta domesticus	0.204	0.47	0.032	0.395	0.7	Patton, 1967
Patton's Diet 14	25% alfalfa meal 10% brewer's yeast, dry 20% corn meal 25% soybean meal 20% wheat middlings	NA	Agricultural product, agricultural byproduct, animal byproduct	Supplemented	Acheta domesticus	0.217	0.37	0.037	0.21	0.69	Patton, 1967
Patton's Diet 15	5% brewer's yeast, dry 20% corn meal 10% fish meal 15% milk, dried skim 20% soybean meal 30% wheat middlings	NA	Agricultural product, agricultural byproduct, animal byproduct	Supplemented	Acheta domesticus	0.245	0.385	0.054	0.365	0.8	Patton, 1967
Patton's Diet 16	10% brewer's yeast, dry 10% corn meal 10% liver powder 15% milk, dried skim 30% soybean meal 25% wheat middlings	NA	Agricultural product, agricultural byproduct, animal byproduct	Supplemented	Acheta domesticus	0.305	0.367	0.052	0.43	0.78	Patton, 1967
Patton's Diet 16 (modified 1)	Patton's 16 (unspecified modification)	NA	Agricultural product, agricultural byproduct, animal byproduct	Supplemented	Acheta domesticus	0.3	0.502	0.04	0.32	0.8	Sorjonen et al., 2019
Patton's Diet 16 (modified 1)	Patton's 16 (unspecified modification)	NA	Agricultural product, agricultural byproduct, animal byproduct	Supplemented	Gryllus bimaculatus	0.3	0.502	0.04	0.7	0.35	Sorjonen et al., 2019
Patton's Diet 16 (modified 2)	Vitamin mixture Vanderzant and s alt mixture Wesson added	NA	Agricultural product, agricultural byproduct, animal byproduct	Supplemented	Acheta domesticus	0.302	0.51	0.039	0.35	0.88	Sorjonen et al., 2019
Patton's Diet 16 (modified 2)	Vitamin mixture Vanderzant and s alt mixture Wesson added	NA	Agricultural product, agricultural byproduct, animal byproduct	Supplemented	Gryllus bimaculatus	0.302	0.51	0.039	0.75	0.37	Sorjonen et al., 2019
Patton's Diet 2	40% alfalfa meal 5% brewer's yeast, dry 20% corn meal 20% meat scrap 7% milk, dried skim 8% soybean meal	NA	Agricultural product, agricultural byproduct, animal byproduct	Supplemented	Acheta domesticus	0.256	0.282	0.046	0.23	0.45	Patton, 1967
Patton's Diet 3	5% brewer's yeast, dry 20% corn meal 5% liver powder 15% milk, dried skim 20% soybean meal 35% wheat middlings	NA	Agricultural product, agricultural byproduct, animal byproduct	Supplemented	Acheta domesticus	0.236	0.329	0.043	0.405	0.68	Patton, 1967
Patton's Diet 4	35% alfalfa meal 5% brewer's yeast, dry 20% corn meal 5% liver powder 15% milk, dried skim 20% soybean meal	NA	Agricultural product, agricultural byproduct, animal byproduct	Supplemented	Acheta domesticus	0.258	0.349	0.035	0.34	0.67	Patton, 1967
Patton's Diet 5	70% alfalfa meal 5% brewer's yeast, dry 20% fish meal 5% liver powder	NA	Agricultural product, agricultural byproduct, animal byproduct	Supplemented	Acheta domesticus	0.298	0.167	0.037	0.255	0.53	Patton, 1967	**** carbohydrate contents for Vaga et al., 2019, 2020
Patton's Diet 6	60% alfalfa meal 5% brewer's yeast, dry 25% corn meal 5% liver powder 5% starch (corn)	NA	Agricultural product, agricultural byproduct, animal byproduct	Supplemented	Acheta domesticus	0.205	0.356	0.028	0.3	0.56	Patton, 1967
Patton's Diet 7	5% brewer's yeast, dry 25% corn meal 5% liver powder 5% starch (corn) 60% wheat middlings	NA	Agricultural product, agricultural byproduct, animal byproduct	Supplemented	Acheta domesticus	0.148	0.48	0.036	0.345	0.5	Patton, 1967
Patton's Diet 8	29% alfalfa meal 5% brewer's yeast, dry 30% casein 5% liver powder 1% salt mix 30% starch (corn)	NA	Agricultural product, agricultural byproduct, animal byproduct	Supplemented	Acheta domesticus	0.416	0.379	0.019	0.18	0.51	Patton, 1967
Patton's Diet 9	10% brewer's yeast, dry 42% corn meal 20% meat scrap 28% wheat middlings	NA	Agricultural product, agricultural byproduct, animal byproduct	Supplemented	Acheta domesticus	0.193	0.494	0.043	0.19	0.66	Patton, 1967
Potato-10.0, 30% protein	Patton’s (1967) diet no. 16, in which the major protein source, soybeans, was partly or totally replaced with by potato protein, a by-product of potato flour production	Finnamyl Oy	Agricultural product, agricultural byproduct, animal byproduct	Supplemented	Ruspolia differens	0.305	0.512	0.04	0.45	0.75	Sorjonen et al., 2020
Potato-2.5, 17% protein	Based on modified Suomalainen (1999), in which the major protein source, soybeans, was partly or totally replaced with by potato protein, a by-product of potato flour production	Finnamyl Oy	Agricultural product, agricultural byproduct, animal byproduct	Supplemented	Ruspolia differens	0.174	0.565	0.047	0.5	0.7	Sorjonen et al., 2020
Potato-20.0, 30% protein	Patton’s (1967) diet no. 16, in which the major protein source, soybeans, was partly or totally replaced with by potato protein, a by-product of potato flour production	Finnamyl Oy	Agricultural product, agricultural byproduct, animal byproduct	Supplemented	Ruspolia differens	0.305	0.522	0.041	0.44	0.76	Sorjonen et al., 2020
Potato-5.0, 17% protein	Based on modified Suomalainen (1999), in which the major protein source, soybeans, was partly or totally replaced with by potato protein, a by-product of potato flour production	Finnamyl Oy	Agricultural product, agricultural byproduct, animal byproduct	Supplemented	Ruspolia differens	0.174	0.601	0.04	0.48	0.7	Sorjonen et al., 2020
Potato-all	Patton's 16 with all of the soybean meal replaced with potato protein (20% proportion of total feed, by-product of potato flour production.)	Finnamyl Oy	Agricultural product, agricultural byproduct, animal byproduct	Supplemented	Acheta domesticus	0.305	0.522	0.041	0.33	0.75	Sorjonen et al., 2019
Potato-all	Patton's 16 with all of the soybean meal replaced with potato protein (20% proportion of total feed, by-product of potato flour production.)	Finnamyl Oy	Agricultural product, agricultural byproduct, animal byproduct	Supplemented	Gryllus bimaculatus	0.305	0.522	0.041	0.75	0.45	Sorjonen et al., 2019
Potato-half	Patton's 16 with half of the soybean meal replaced with potato protein (10% proportion of total feed, by-product of potato flour production)	Finnamyl Oy	Agricultural product, agricultural byproduct, animal byproduct	Supplemented	Acheta domesticus	0.305	0.512	0.04	0.33	0.75	Sorjonen et al., 2019
Potato-half	Patton's 16 with half of the soybean meal replaced with potato protein (10% proportion of total feed, by-product of potato flour production)	Finnamyl Oy	Agricultural product, agricultural byproduct, animal byproduct	Supplemented	Gryllus bimaculatus	0.305	0.512	0.04	0.87	0.42	Sorjonen et al., 2019
Poultry feed and rice bran	5:1 ratio of poultry feed starter to rice bran	NA	Commercial, agricultural byproduct	Supplemented	Acheta domesticus	0.25	NA	0.095	0.3	NA	Lundy and Parella, 2015
Poultry manure, wheat straw, rice silage	2:1:1 ratio of poultry manure, wheat straw and rice straw silage prepared according to the principals in Oji et al.	NA	Agricultural byproduct, animal byproduct	Pure alternative	Acheta domesticus	0.0875	NA	0.011	0	0	Lundy and Parella, 2015
Pumpkin leaves	Cucurbita pepo L. (Violales: Cucurbitaceae)	sourced once from a farmer who practiced organic farming with no chemicals used for insect pest management to ensure that they were free from any pesticide residues	Agricultural byproduct	Pure alternative	Scapsipedus icipe	0.2442	0.26	3.64%*	0.63	0.85	Magara et al., 2015
Pure Pride Cricket Feed	fish meal, soybean meal, ground Acacia leaves, corn meal, rice bran, vegetable oil, dicalcium phosphate, salt, vitamins, minerals, and amino acids	Pure pride cricket feed 7001, Thai feed mill, Bangkok, Thailand	Commercial	Pure commercial	Acheta domesticus	0.219	0.656	0.014	0.523	0.96	Bawa et al., 2020
Pure Pride Cricket Feed + Fresh Pumpkin Pulp	250g "Pure Pride" + 100g Cucurbita maxima	Pure pride cricket feed 7001, Thai feed mill, Bangkok, Thailand an Cucurbita maxima purchased from a local market (Tesco Lotus, Co. Ltd., Bangkok, Thailand	Commercial, agricultural product	Supplemented	Acheta domesticus	0.175	0.691	0.017	0.537	0.96	Bawa et al., 2020
Pure Pride Cricket Feed + Pumpkin Powder	250g "Pure Pride" + 100g Cucurbita maxima "placed in a ceramic bowl and dried at 600 W for 8 min at 2 min regular intervals, using a domestic microwave oven (Sharp, R-380I, Thailand). The dry pumpkin pulp was then milled into powder, using a heavy-duty blender"	Cucurbita maxima purchased from a local market (Tesco Lotus, Co. Ltd., Bangkok, Thailand	Commercial, agricultural product	Supplemented	Acheta domesticus	0.196	0.665	0.022	0.543	0.97	Bawa et al., 2020
Purina Cricket Chow	NA	Purina Cricket Chow, Purina Animal Nutrition LLC, Shoreview, MN, USA).	Commercial	Pure commercial	Acheta domesticus	NA	NA	NA	0.31	0.825	Morales-Ramos et al., 2020
Rapeseed meal + wheat meal + early cut red clover hay	Trifolium pratense	NA	Commercial, weed	Supplemented	Acheta domesticus	NA	NA	NA	0.221	NA	Vaga et al., 2020
Rapeseed meal + wheat meal + late cut red clover hay	Trifolium pratense	NA	Commercial, weed	Supplemented	Acheta domesticus	NA	NA	NA	0.263	NA	Vaga et al., 2020
Rapeseed meal + wheat meal + white nettle hay	Lamium album plants were dried separately in paper bags at room temperature for six days, and then stored in climate stable storage room	NA	Commercial, weed	Supplemented	Acheta domesticus	NA	NA	NA	0.151	NA	Vaga et al., 2020
Reindeer feed	NA	Poro-Elo, Hankkija	Commercial	Pure commercial	Ruspolia differens	0.117	NA	NA	0.35	0.62	Sorjonen et al., 2020
Rice bran	unspecified species	Purchased from local market in Cambodia	Agricultural byproduct	Pure alternative	Teleogryllus testaceus	0.102	NA	0.12	0.5	0.35	Miech et al., 2016
Rice bran	NA	The rice bran was obtained from Dominion Farms Unlimited	Agricultural byproduct	Pure alternative	Acheta domesticus	0.1922	NA	0.1862	NA	NA	Orinda et al., 2017
Rice bran	NA	The rice bran was obtained from Dominion Farms Unlimited	Agricultural byproduct	Pure alternative	Gryllus bimaculatus	0.1922	NA	0.1862	NA	NA	Orinda et al., 2017
Rough comfrey	Symphytum asperum the plants were dried separately in paper bags at room temperature for six days, and then stored in climate stable storage room	Collected from the fields around Uppsala during the flowering season in July 2018, when the plants were in full bloom.	Weed	Pure alternative	Acheta domesticus	0.181	NA	NA	NA	0.21	Vaga et al., 2020
Soybean meal	Glycine max L. (Fabales: Fabaceae)	Purchased from a certified stockist in a local market in Nairobi, Kenya.	Agricultural product	Pure alternative	Scapsipedus icipe	0.4113	0.2425	3.78%*	0.74	0.9	Magara et al., 2015
Chicken feed (2 weeks) vegetable waste (2 weeks)	Chicken feed and fruit and vegetable waste	The vegetable waste was ‘designed’ based on global composition records of food waste (WRAP, 2009). It consisted of 63.7% vegetables (56.0% root vegetables, 16.0% stem-leaf vegetables, 11.0% fruit-seed vegetables, 17.0% other vegetables e.g. leeks, peppers) and 36.3% fruit (28.0% bananas, 23.0% apples, 16.0% citrus fruit, 33.0% other fruit e.g. berries, melon and stone-fruit). All the fruits and v…	Commercial, Food waste	Supplemented	Gryllus bimaculatus	NA	NA	NA	0.35	0.4	Dobermann et al., 2019
Synedrella nodiflora	Synedrella nodiflora	(grows in upland fields and wastelands) was collected once every two weeks by a farmer at Kompong Sela, Koh Kong province, in the south of Cambodia, transported by car (about 4 h) to CelAgrid and prepared (cleaned, washed, trimmed and bunched) and stored at 10 °C	Weed	Pure alternative	Teleogryllus testaceus	0.235	NA	0.034	0.5	0.3	Miech et al., 2016
Synedrella nodiflora	Synedrella nodiflora	(grows in upland fields and wastelands) was collected once every two weeks by a farmer at Kompong Sela, Koh Kong province, in the south of Cambodia, transported by car (about 4 h) to CelAgrid and prepared (cleaned, washed, trimmed and bunched) and stored at 10 °C	Weed	Pure alternative	Acheta domesticus	0.193	NA	0.048	0.7	0.4	Miech et al., 2016
Taro aerial part flour	Taro aerial parts (unspecified genus and species) , also called talo, kalo, dahseen, and saonjo)	collected from the countryside near Banlung, Vietnam and sun-dried until they could be ground with a mortar and a pestle	Agricultural product	Pure alternative	Teleogryllus testaceus	0.166	0.541	3.8%**	0.607	0.9	Megido et al., 2015
Taro aerial part flour+brown rice flour	Taro aerial part flour (80%)+brown rice flour (20%)	Brown rice was purchased from Banlung market	Agricultural product	Pure alternative	Teleogryllus testaceus	0.142	0.563	4.2%**	0.716	0.8889	Megido et al., 2015
Turnip rape (medium protein)	Patton's 16 with al of the soybean meal replaced with turnip rape (Brassica rapa) (5% total proportion of feed). Turnip rape is a by-product of rapeseed oil production	Kankaisten ljykasvit Oy	Food waste, agricultural product, agricultural byproduct, animal byproduct	Supplemented	Acheta domesticus	0.225	0.568	0.059	0.38	0.75	Sorjonen et al., 2019
Chicken feed (1 week) vegetable waste (3 weeks)	Chicken feed and fruit and vegetable waste	The vegetable waste was ‘designed’ based on global composition records of food waste (WRAP, 2009). It consisted of 63.7% vegetables (56.0% root vegetables, 16.0% stem-leaf vegetables, 11.0% fruit-seed vegetables, 17.0% other vegetables e.g. leeks, peppers) and 36.3% fruit (28.0% bananas, 23.0% apples, 16.0% citrus fruit, 33.0% other fruit e.g. berries, melon and stone-fruit). All the fruits and v…	Commercial, Food waste	Supplemented	Gryllus bimaculatus	NA	NA	NA	0.15	0.2	Dobermann et al., 2019
Vegetable waste (4 weeks)	63.7% vegetables (56.0% root vegetables, 16.0% stem-leaf vegetables, 11.0% fruit-seed vegetables, 17.0% other vegetables e.g. leeks, peppers) and 36.3% fruit (28.0% bananas, 23.0% apples, 16.0% citrus fruit, 33.0% other fruit e.g. berries, melon and stone-fruit).	NA	Food waste	Pure alternative	Gryllus bimaculatus	0.091	NA	NA	0.5	0.13	Dobermann et al., 2019
Turnip rape (low protein)	Patton's 16 with al of the soybean meal replaced with turnip rape (Brassica rapa) (7% total proportion of feed). Turnip rape is a by-product of rapeseed oil production	Kankaisten ljykasvit Oy	Food waste, agricultural product, agricultural byproduct, animal byproduct	Supplemented	Acheta domesticus	0.15	0.66	0.04	0.3	0.75	Sorjonen et al., 2019
Spent grain	By-product of beer brewing, composed of solid barley grain husks	Purchased from local market in Cambodia	Food waste	Pure alternative	Teleogryllus testaceus	0.271	NA	0.041	0.5	0.1	Miech et al., 2016
Okara	Okara is a soybean residue from the manufacture of soy milk and tofu	Okara was obtained from a local soybean snack shop, NandB Snack at Block 148, Singapore, Republic of Singapore.	Food waste	Pure alternative	Acheta domesticus	NA	NA	NA	0.3	0	Quek et al., 2019
Turnip rape 15% protein	Patton’s (1967) diet no. 16, in which the major protein source, soybeans, was partly or totally replaced with turnip rape, a by-product of rape seed oil production	Kankaisten Oljykasvit Oy	Agricultural product, agricultural byproduct, animal byproduct	Supplemented	Ruspolia differens	0.15	0.66	0.05	0.38	0.65	Sorjonen et al., 2020
Food waste	The solid, pasteurized, post-process filtrate from a proprietary, aerobic enzymatic digestion process [29] that converts grocery store food waste into 90% liquid fertilizer and 10% solids	NA	Food waste	Pure alternative	Acheta domesticus	0.2875	NA	0.193	0.225	NA	Lundy and Parella, 2015
Urtica dioica	Common nettle	Store-bought organically grown common nettle powder (Superfruit Scandinavia AB, Stockholm, Sweden).	Weed	Pure alternative	Acheta domesticus	0.142	NA	NA	NA	0.21	Vaga et al., 2020
Vegetable 10% protein	Patton’s (1967) diet no. 16, in which the major protein source, soybeans, was partly or totally replaced with potato protein (potato flour by-product), carrot(vegetable industry by-product), and apple (apple juice production by-product)	Finnamyl Oy, anonymous apple juice producer	Agricultural product, agricultural byproduct, animal byproduct	Supplemented	Ruspolia differens	0.0975	NA	0.0754	0.29	0.45	Sorjonen et al., 2020
Vegetable 7.2% protein	Patton’s (1967) diet no. 16, in which the major protein source, soybeans, was partly or totally replaced with potato protein (potato flour by-product), carrot(vegetable industry by-product), and apple (apple juice production by-product)	Finnamyl Oy, anonymous apple juice producer	Agricultural product, agricultural byproduct, animal byproduct	Supplemented	Ruspolia differens	0.0723	NA	0.0752	0.26	0.42	Sorjonen et al., 2020
Food waste (minimally processed)	Post-consumer food waste collected from municipalities throughout California’s Bay Area. This is an abundant, heterogeneous substrate that is typically collected and composted at an industrial scale	California Bay Area industrial scale food waste	Food waste	Pure alternative	Acheta domesticus	0.1375	NA	0.0915	0.05	0	Lundy and Parella, 2015
Wheat and maize silage	1:1 ratio of wheat and maize silage prepared at an industrial scale as dairy cow rations and containing approximately 50% non-grain aboveground biomass (straw)	NA	Agricultural product	Pure alternative	Acheta domesticus	0.09375	NA	0.028	0.025	0	Lundy and Parella, 2015
Wheat bran	Triticum aestivum L. (Cyperales: Poaceae)) (coarse outer coating of the wheat seed)	purchased from a certified stockist in a local market in Nairobi, Kenya.	Agricultural byproduct	Pure alternative	Scapsipedus icipe	NA	0.2505	5.18%*	0.78	0.9	Magara et al., 2015
White clover	Trifolium repens the plants were dried separately in paper bags at room temperature for six days, and then stored in climate stable storage room	Collected from the fields around Uppsala during the flowering season in July 2018, when the plants were in full bloom.	Weed	Pure alternative	Acheta domesticus	0.222	1.3%***	0.02	0.025	0.05	Vaga et al., 2020
White nettle	Lamium album the plants were dried separately in paper bags at room temperature for six days, and then stored in climate stable storage room	Collected from the fields around Uppsala during the flowering season in July 2018, when the plants were in full bloom.	Weed	Pure alternative	Acheta domesticus	0.164	2.1%***	0.032	0.025	0.25	Vaga et al., 2020
Young cassava leaf flour	Cassava leaves (unspecified genus and species), also commonly called manioc or yuca	collected from the countryside near Banlung, Vietnam and sun-dried until they could be ground with a mortar and a pestle	Agricultural product	Pure alternative	Teleogryllus testaceus	0.295	0.442	6.5%**	0.821	0.8667	Megido et al., 2015
Young cassava leaf flour+brown rice flour	Young cassava leaf flour (80%)+brown rice flour (20%)	brown rice purchased from Banlung market	Agricultural product	Pure alternative	Teleogryllus testaceus	0.246	0.484	6.4%**	0.905	0.87	Megido et al., 2015
Young cassava leaf flour+brown rice flour+banana	Young cassava leaf flour (80%)+brown rice flour (20%) + one banana sliced a week (2mm thick)	Brown rice and bananas were purchased from Banlung market	Agricultural product	Pure alternative	Teleogryllus testaceus	0.192	0.578	5.5%**	1.035	0.9223	Megido et al., 2015
*Listed in study as "crude lipid" rather than "crude fat"
**Fat content was determined by Folch extraction, unclear as to whether this is crude fat				·
***listed in study as "starch", so likely an underestimate of carbohydrate content
